1 **A comparison of non-magnetic and magnetic beads for measuring IgG**  
2 **antibodies against *P. vivax* antigens in a multiplexed bead-based assay**  
3 **using Luminex<sup>®</sup> technology (Bio-Plex<sup>®</sup> 200 or MAGPIX<sup>®</sup>).**

4

5 Ramin Mazhari<sup>1,2</sup>, Jessica Brewster<sup>1</sup>, Rich Fong<sup>3</sup>, Caitlin Bourke<sup>1,2</sup>, Zoe SJ Liu<sup>1,2</sup>, Eizo Takashima<sup>4</sup>,  
6 Takafumi Tsuboi<sup>4</sup>, Wai-Hong Tham<sup>1,2</sup>, Matthias Harbers<sup>5,6</sup>, Chetan Chitnis<sup>7</sup>, Julie Healer<sup>1,2</sup>, Maria Ome-  
7 Kaius<sup>1,8</sup> Jetsumon Sattabongkot<sup>9</sup>, James Kazura<sup>3</sup>, Leanne J. Robinson<sup>1,2,8,10</sup>, Christopher King<sup>3</sup>, Ivo  
8 Mueller<sup>1,2,11¶</sup>, Rhea J. Longley<sup>1,2¶\*</sup>

9

10 <sup>1</sup>Population Health and Immunity Division, Walter and Eliza Hall Institute of Medical Research, Parkville,  
11 Victoria, Australia

12 <sup>2</sup>Department of Medical Biology, University of Melbourne, Parkville, Victoria, Australia

13 <sup>3</sup>Case Western Reserve University, Cleveland, United States

14 <sup>4</sup>Division of Malaria Research, Proteo-Science Center, Ehime University, Matsuyama, Japan

15 <sup>5</sup>CellFree Sciences Co., Ltd., Yokohama, Japan

16 <sup>6</sup>RIKEN Center for Integrative Medical Sciences, Yokohama, Japan

17 <sup>7</sup>Malaria Parasite Biology and Vaccines, Department of Parasites & Insect Vectors, Institut Pasteur,  
18 Paris, France

19 <sup>8</sup>Vector Borne Diseases Unit, PNG Institute of Medical Research, Madang, Papua New Guinea

20 <sup>9</sup>Mahidol Vivax Research Unit, Faculty of Tropical Medicine, Mahidol University, Bangkok, Thailand

21 <sup>10</sup>Burnet Institute, Melbourne, Australia

22 <sup>11</sup>Malaria Parasites & Hosts Unit, Department of Parasites & Insect Vectors, Institut Pasteur, Paris,  
23 France

24

25 \* Corresponding author

26 E-mail: [Longley.r@wehi.edu.au](mailto:Longley.r@wehi.edu.au) (RJL)

27

28 ¶These authors contributed equally to this work.

29

## 30 **Abstract**

31 Multiplexed bead-based assays that use Luminex xMAP® technology have become popular for  
32 measuring antibodies against proteins of interest in many fields, including malaria and more recently  
33 SARS-CoV-2/COVID-19. There are currently two formats that are widely used: non-magnetic beads or  
34 magnetic beads. Data is lacking regarding the comparability of results obtained using these two types  
35 of beads, and for assays run on different instruments. Whilst non-magnetic beads can only be run on  
36 flow-based instruments (such as the Luminex® 100/200™ or Bio-Plex® 200), magnetic beads can be  
37 run on both these and the newer MAGPIX® instruments. In this study we utilized a panel of purified  
38 recombinant *Plasmodium vivax* proteins and samples from malaria-endemic areas to measure *P. vivax*-  
39 specific IgG responses using different combinations of beads and instruments. We directly compared: i)  
40 non-magnetic versus magnetic beads run on a Bio-Plex® 200, ii) magnetic beads run on the Bio-Plex®  
41 200 versus MAGPIX® and iii) non-magnetic beads run on a Bio-Plex® 200 versus magnetic beads run  
42 on the MAGPIX®. We also performed an external validation of our optimized assay. We observed that  
43 IgG antibody responses, measured against our panel of *P. vivax* proteins, were strongly correlated in all  
44 three of our comparisons, however higher amounts of protein were required for coupling to magnetic  
45 beads. Our external validation indicated that results generated in different laboratories using the same  
46 coupled beads are also highly comparable, particularly if a reference standard curve is used.

47

## 48 **Introduction**

49 Over the past 5-10 years there has been a rapid uptake of Luminex bead-based technologies to  
50 measure antibody responses to multiple proteins simultaneously. These assays have numerous  
51 advantages over traditional enzyme-linked immunosorbent assays (ELISA), such as a reduction in  
52 sample volume required and reduced laboratory time, as well as the main advantage of allowing  
53 multiplexed detection of antibody responses. This is particularly relevant for the detection of antibodies  
54 against complex pathogens that express many hundreds to thousands of proteins, such as the

55 *Plasmodium* parasites (the causative agent of malaria). Access to standardized control reagents [1] will  
56 also allow results from these assays to be reliably compared between different laboratories, which may  
57 result in more consistent findings between different studies [2].

58

59 Multiplexed bead-based assays use Luminex xMAP® technology [3], which centers on use of beads  
60 (microspheres) with different fluorescent colours that can be detected in unique regions on a  
61 compatible instrument such as a Luminex® 200™ (also known as a Bio-Plex® 200, sold by Bio-Rad) or  
62 MAGPIX®. Proteins of interest can be coupled to a unique set of beads, facilitating multiplexed  
63 detection of antibody responses to multiple proteins. Several studies have been conducted with a focus  
64 on optimizing various steps of the coupling process or assay work-flow, in the context of detection of  
65 antibodies against *Plasmodium* proteins, such as bead coupling [4], sample pre-dilution [4], assay  
66 temperature [4], plate washing [4], operator expertise [4], incubation times [1], and bead numbers [5].  
67 Two different types of beads are available for coupling proteins: non-magnetic and magnetic. Non-  
68 magnetic beads can only be run on flow-based instruments such as the Luminex® 200™/Bio-Plex® 200,  
69 whilst magnetic beads can be run on both, flow-based instruments and the MAGPIX®. The MAGPIX® is  
70 based on CCD imaging technology, and offers advantages over the flow-based systems such as faster  
71 acquisition time, reduced use of reagents such as sheath fluid and the reduced cost of the MAGPIX®  
72 instrument compared to the Luminex® 200™/Bio-Plex® 200 instruments.

73

74 The primary aim of this study was to perform a series of comparisons of both non-magnetic and  
75 magnetic beads and assaying those beads on the Bio-Plex® 200 or the MAGPIX®. A secondary aim  
76 was to demonstrate that this assay is highly reproducible in an independent laboratory through an  
77 external validation. This study used a panel of 19 different *P. vivax* proteins and plasma samples from  
78 *P. vivax*-endemic areas to detect *P. vivax*-specific IgG responses, however the large number of  
79 proteins assessed and consistent results obtained, suggest these findings should be generalizable for  
80 optimization of the multiplexed bead-based assay for other pathogens. This is important in the context

81 of the ongoing SARS-CoV-2 pandemic, as multiple laboratory assays based on Luminex technology  
82 are under development [6-8].

83

## 84 **Materials and methods**

### 85 **Plasma samples**

86 For all assays described here, a pool of samples from individuals from Papua New Guinea (PNG) with  
87 high levels of anti-*Plasmodium* antibodies was used as a positive control for the standard curve dilution  
88 to adjust for plate to plate variation, as previously described [9].

89

90 Two sets of plasma samples from malaria-endemic areas were used for comparisons of non-magnetic  
91 and magnetic beads, and the different acquisition instruments. These were 80 individuals from a  
92 longitudinal observational cohort study in Thailand, conducted in the Kanchanaburi and Ratchaburi  
93 provinces in 2013-2014. This cohort has previously been described in detail [10, 11], and the 80 plasma  
94 samples used were collected at the last visit of the cohort. The second set of samples came from a  
95 longitudinal observational cohort study in the Solomon Islands, conducted on the island Ngella in 2013-  
96 2014. This cohort has previously been described in detail [10, 12], and 83 plasma samples were used  
97 from individuals at the last visit of this cohort.

98

99 An additional set of plasma samples from a cohort study in PNG was used for external validation of the  
100 assay. Samples were selected from the Mugil II paediatric cohort study. The study enrolled 450 children  
101 aged 5-12 years old in 2012 from the Mugil area on the North Coast of Madang province. All children  
102 were given antimalarial drugs to eliminate blood-stage *Plasmodium spp* and blood samples were  
103 collected for parasitological and immunological studies. For the external validation, a set of 425  
104 samples was used from the baseline timepoint (collected 2 weeks after drug treatment).

105

106 **Ethics statement**

107 All samples were collected after approval from local ethics committees, with volunteers/participants  
108 providing written informed consent and/or assent. The Ethics Committee of the Faculty of Tropical  
109 Medicine, Mahidol University, Thailand approved the Thai cohort study (MUTM 2013-027-01). The  
110 National Health Research and Ethics Committee of the Solomon Islands Ministry of Health and Medical  
111 Services (HRC12/022) approved the Solomon Islands study. The Mugil II paediatric cohort was  
112 approved by the PNG Institute of Medical Research Institutional Review Board (IMR IRB) (1116/1204),  
113 the PNG Medical Research Advisory Committee (MRAC) (11.21/1206), the Walter and Eliza Hall  
114 Institute Human Research Ethics Committee (WEHI HREC) (12/09), and the Case Western Reserve  
115 University Hospitals of Cleveland Medical Center (CWRU UHCMC) (05-11-11). The HREC at WEHI  
116 approved samples for use in Melbourne (#14/02).

117  
118 **Coupling *P. vivax* proteins to non-magnetic and magnetic beads**

119 The carboxylated beads were sourced from Bio-Rad (Bio-Plex COOH Beads, 1ml,  $1.25 \times 10^7$  beads/ml  
120 and Bio-Plex Pro Magnetic COOH Beads, 1ml,  $1.25 \times 10^7$  bead/ml) and stored at 2-4°C. Optimisation of  
121 coupling procedures for non-magnetic and magnetic beads were done separately, due to the larger size  
122 of the magnetic beads generally requiring more protein (see Results). To be able to measure all plasma  
123 samples at the same dilution, we optimized all protein concentrations by generating a log-linear  
124 standard curve with a positive control plasma pool from immune PNG donors (high responders to  
125 *Plasmodium* antigens).

126  
127 Coupling of *P. vivax* proteins to non-magnetic beads was performed as previously described [10].  
128 Briefly, the optimised antigen concentration (Tables 1 and 2) was coupled to  $2.5 \times 10^6$  pre-activated  
129 microspheres, in 100 mM monobasic sodium phosphate buffer pH 6.0, using 50mg/ml sulfo-NHS and  
130 50 mg/ml of EDC to cross-link the proteins to the beads. The activated beads were washed and stored  
131 in PBS, 0.1% BSA, 0.02% Tween-20, 0.05% Na-azide, pH 7.4 at 4°C until use. For the coupling to

132 magnetic beads, a magnet rack was used for pelleting the beads, instead of the centrifugation step for  
133 non-magnetic beads. We qualitatively assessed the stability of the coupled beads by visual comparison  
134 of the MFI of the standard curve over a nine-month period.

135

136 *Plasmodium vivax* recombinant antigens were expressed and purified in three countries: Japan  
137 (Takafumi Tsuboi, Ehime University & Matthias Harbers, CellFree Sciences), Australia (Wai-Hong  
138 Tham and Julie Healer, Walter & Eliza Hall Institute of Medical Research) and France (Chetan Chitnis,  
139 Institut Pasteur). Proteins were expressed either in the wheat-germ cell-free expression system  
140 (WGCF) or *E. coli*. See Table 1 for a complete list of proteins and the optimised amount coupled to  
141 non-magnetic and magnetic beads.

142 **Table 1:** *P. vivax* proteins used in the comparison experiments, with the amount of protein coupled per  
 143 non-magnetic and magnetic beads indicated. Gene annotations and protein IDs were sourced from  
 144 PlasmoDB (release 36, <http://plasmodb.org/plasmo/>), or GenBank when necessary.

| Gene Annotation          | Protein ID | Expression System | Protein Concentration (µg/ul) | Construct, amino acids (size) | Protein amount (µg/1x10 <sup>6</sup> ) non-magnetic beads | Protein amount (µg/1x10 <sup>6</sup> ) magnetic beads |
|--------------------------|------------|-------------------|-------------------------------|-------------------------------|-----------------------------------------------------------|-------------------------------------------------------|
| RBP2b (P25)              | PVX_094255 | <i>E. coli</i>    | 4.15                          | 161-1454 (1294)               | 0.21                                                      | 0.24                                                  |
| MSP1-19                  | PVX_099980 | WGCF              | 1.55                          | 1622-1729 (108)               | 0.30                                                      | 1.60                                                  |
| RBP2b                    | PVX_094255 | WGCF              | 2.06                          | 1986-2653 (667)               | 0.28                                                      | 3.20                                                  |
| RAMA                     | PVX_087885 | WGCF              | 0.78                          | 462-730 (269)                 | 0.06                                                      | 0.48                                                  |
| PvEBPII                  | KMZ83376.1 | <i>E. coli</i>    | 10                            | 109-432 (324)                 | 0.08                                                      | 0.20                                                  |
| SSA-s16                  | PVX_000930 | WGCF              | 0.41                          | 31-end (110)                  | 0.40                                                      | 0.80                                                  |
| PvRIPR                   | PVX_095055 | <i>E. coli</i>    | 1                             | 552-1075 (524)                | 0.40                                                      | 0.80                                                  |
| MSP3.10                  | PVX_097720 | WGCF              | 0.64                          | 25-end (828)                  | 0.40                                                      | 0.80                                                  |
| Hyp. Protein             | PVX_097715 | WGCF              | 0.7                           | 20-end (431)                  | 0.14                                                      | 1.20                                                  |
| PvDBPII (AH)             | AAY34130.1 | <i>E. coli</i>    | 0.6                           | 1-237 (237)                   | 0.43                                                      | 0.56                                                  |
| MSP8                     | PVX_097625 | WGCF              | 0.39                          | 24-463 (440)                  | 0.28                                                      | 0.56                                                  |
| Unspecified/<br>Pv-fam-a | PVX_112670 | WGCF              | 1.13                          | 34-end (302)                  | 0.45                                                      | 0.90                                                  |
| Pv-fam-a                 | PVX_096995 | WGCF              | 1.7                           | 61-end (420)                  | 0.34                                                      | 1.20                                                  |
| MSP3.3                   | PVX_097680 | WGCF              | 0.55                          | 21-end (996)                  | 0.48                                                      | 0.32                                                  |
| MSP7.1                   | PVX_082700 | WGCF              | 0.33                          | 23-end (397)                  | 0.40                                                      | 0.60                                                  |
| MSP5                     | PVX_003770 | WGCF              | 0.58                          | 23-365 (343)                  | 0.01                                                      | 0.016                                                 |
| MSP7                     | PVX_082670 | WGCF              | 0.61                          | 24-end (388)                  | 0.40                                                      | 0.40                                                  |
| PvTRAP/<br>SSP2          | PVX_082735 | WGCF              | 0.9                           | 26-493 (468)                  | 0.40                                                      | 0.80                                                  |
| PvDBPII (sal1)           | PVX_110810 | <i>E. coli</i>    | 1.2                           | 193-521 (329)                 | 0.29                                                      | 0.24                                                  |



145 **Table 2:** *P. vivax* proteins used for the external validation. Proteins were coupled to non-magnetic  
146 beads at WEHI and half of each batch of bead-conjugated protein was shipped to CWRU.

| Gene Annotation                       | Protein ID | Expression System |
|---------------------------------------|------------|-------------------|
| MSP1-19                               | PVX_099980 | WGCF              |
| Pv-fam-a                              | PVX_096995 | WGCF              |
| hypothetical protein, conserved       | PVX_094830 | WGCF              |
| Pv-fam-a                              | PVX_112670 | WGCF              |
| MSP7                                  | PVX_082650 | WGCF              |
| RBP2b                                 | PVX_094255 | WGCF              |
| hypothetical protein, conserved       | PVX_001000 | WGCF              |
| merozoite surface protein 8           | PVX_097625 | WGCF              |
| PvTRAP/SSP2                           | PVX_082735 | WGCF              |
| MSP7                                  | PVX_082645 | WGCF              |
| PvRBP-2, putative                     | PVX_090330 | WGCF              |
| sexual stage antigen s16,<br>putative | PVX_000930 | WGCF              |

147

#### 148 **Multiplexed assay for measurement of *P. vivax*-specific antibody responses**

149 To measure the IgG levels, a multiplexed bead based assay was used, as previously described [10].  
150 Briefly, antigen-specific IgG was detected by incubating 500 beads of each antigen per well with  
151 plasma diluted at 1:100, in a final volume of 100µl. Non-magnetic beads were washed using a vacuum  
152 manifold, whereas magnetic beads were washed using a magnetic plate washer. After the washings, a  
153 1:100 dilution of PE-conjugated Donkey F(ab)2 anti-human IgG (JIR 709-116-098) was added. At least  
154 15 beads of each region/antigen were then acquired and analysed on a Bio-Plex® 200 instrument  
155 and/or a MAGPIX® instrument as per the manufacturer's instructions. Note that for comparing data  
156 between Bio-Plex® 200 and MAGPIX® instruments it is important that the "high RP1" target is not

157 selected on the Bio-Plex® 200, as this option is not available on the MAGPIX®. On each plate, a twofold  
158 serial dilution from 1/50 to 1/25,600 of a seropositive control plasma pool (generated from PNG adults)  
159 was included. Note that for the external validation both labs used the same PNG control pool to  
160 generate the standard curve.

161

162 The results were expressed as mean fluorescence intensity (MFI) of at least 15 beads for each antigen.

163

### 164 **Instruments**

165 Antibody measurements were acquired using a Bio-Plex® 200 Multiplexing Analyzer System from Bio-  
166 Rad for all non-magnetic coupled beads (Bio-Plex® 200System, Bio-Plex® high-throughput fluidics  
167 system, microplate platform and a computer with the Bio-Plex® manager software v.5.0). Washing  
168 steps were carried out on a Bio-Rad Aurum vacuum manifold.

169

170 For all magnetic coupled beads a MAGPIX® Multiplexing System from Millipore was used (MAGPIX®  
171 System and the Xponent software V.4.2). Washing steps were carried out using a magnetic plate  
172 washer from BioTek Instruments (BioTek ELx50). A Bio-Rad Sure Beads magnetic rack was used  
173 during the coupling process.

174

175 Plates were incubated on a Ratek Platform shaker (Microtiter/PCR Plate Shaker). A Vortex Sonicator  
176 (Branson 2200), a BioSan Vortex V-1 plus and a Table centrifuge (Eppendorf Centrifuge 5424) were  
177 also used during the coupling process.

178

### 179 **Statistical analysis**

180 The raw MFI results were converted to relative antibody units (RAU) using protein-specific standard  
181 curve data. A log–log model was used to obtain a more linear relationship, and a five-parameter logistic

182 function was used to obtain an equivalent dilution value compared to the PNG control plasma (ranging  
183 from  $1.95 \times 10^{-5}$  to 0.02). The interpolation was performed in R. Pearson's  $r^2$  correlations were  
184 performed to determine the strength of correlation and the statistical significance for all comparisons.  
185 To enable these parametric correlations, data were log-transformed prior to the analysis to better fit the  
186 normal distribution.

187

## 188 **Results and discussion**

### 189 **Comparison of total IgG antibodies detected against *P. vivax* antigens coupled to either non- 190 magnetic or magnetic beads and assayed by a Bio-Plex® 200 instrument.**

191 Total IgG antibody levels against a panel of 19 *P. vivax* proteins, measured in plasma samples from  
192 163 individuals living in malaria-endemic areas of Thailand and the Solomon Islands, were assayed  
193 using either non-magnetic or magnetic beads and run on a Bio-Plex® 200 instrument. IgG levels to 18  
194 of 19 proteins were well correlated between non-magnetic and magnetic assays, with Pearson  $r^2$ -  
195 values ranging from 0.29-0.95 (all  $p < 0.0001$ ) (Figure 1), supporting previous findings based on *P.*  
196 *falciparum* proteins [13]. This is despite different amounts of each protein being coupled to non-  
197 magnetic versus magnetic beads (Table 1). The exception was for the protein PVX\_003770 (MSP5),  
198 with the lowest correlation coefficient at  $r^2 = 0.075$  ( $p < 0.001$ ). A sub-set of the samples that had relatively  
199 high antibody levels for PVX\_003770 when assayed with non-magnetic beads had relatively low  
200 antibody levels when assayed with magnetic beads, likely accounting for the lower correlation  
201 coefficient observed. Interestingly, the amount of protein coupled for PVX\_003770 (for both non-  
202 magnetic and magnetic beads) was substantially lower than for the other proteins. Future experiments  
203 are planned to determine whether increasing the protein amount for PVX\_003770 could result in a  
204 higher correlation between the two platforms.

205

206 **Figure 1:** IgG antibody levels (RAU) measured against 19 *P. vivax* proteins in samples from malaria-  
207 endemic areas, using either non-magnetic or magnetic beads and run on a Bio-Plex® 200 instrument.  
208 \*\*\* p<0.001, \*\*\*\* p<0.0001.

209

210 **Comparison of total IgG antibodies detected against *P. vivax* antigens coupled to magnetic**  
211 **beads and assayed using either a Bio-Plex® 200 instrument or a MAGPIX® instrument.**

212 For this comparison, all 19 *P. vivax* antigens were coupled to magnetic beads only, at the optimised  
213 antigen concentrations. Total IgG antibody levels were measured in the same set of 163 plasma  
214 samples, with the assay run on both a Bio-Plex® 200 and a MAGPIX® instrument. To our knowledge,  
215 this is the first published report of this comparison. Here, the Pearson  $r^2$  correlation coefficients  
216 indicated a high level of correlation between samples run on both instruments ( $r^2=0.970-0.999$ ,  
217  $p<0.0001$ , Figure 2). These results indicate that results obtained on either platform, when antigens are  
218 coupled at the same optimised concentrations to magnetic beads, are highly comparable. The strength  
219 of the correlations in this comparison is stronger than the previous analysis (which compared non-  
220 magnetic versus magnetic beads on the same instrument), presumably because the same sets of  
221 coupled beads were run on both instruments. The strength of the correlations suggests that results  
222 obtained on the Bio-Plex® 200 and MAGPIX® are interchangeable.

223

224 **Figure 2:** IgG antibody levels (RAU) measured against 19 *P. vivax* proteins in samples from malaria-  
225 endemic areas, using magnetic beads and run on either a Bio-Plex® 200 instrument or MAGPIX®  
226 instrument. \*\*\*\* p<0.0001.

227

228 **Comparison of total IgG antibodies against *P. vivax* antigens coupled to non-magnetic beads**  
229 **and analyzed on a Bio-Plex® 200 instrument and antigens coupled to magnetic beads and**  
230 **analyzed on a MAGPIX® instrument.**

231 The final comparison we wanted to conduct was of antigens coupled to non-magnetic beads and  
232 assayed on a Bio-Plex® 200 instrument with antigens coupled to magnetic beads and assayed on a  
233 MAGPIX® instrument. As non-magnetic beads are cheaper to purchase, users that have only a Bio-  
234 Plex® 200 instrument would potentially favour this configuration (even though the instrument can run  
235 both non-magnetic and magnetic beads). Conversely, for users that only have a MAGPIX® instrument,  
236 they are only able to run magnetic beads as the instrument cannot detect non-magnetic beads. To our  
237 knowledge, this is the first published report of this comparison for a non-commercial assay.

238

239 It was again observed that there was a strong correlation between results obtained using the non-  
240 magnetic beads/Bio-Plex® 200 and magnetic beads/MAGPIX® platforms, with Pearson  $r^2$  correlation  
241 coefficients ranging from 0.18-96 ( $p < 0.0001$ , Figure 3). These correlation coefficients are similar to  
242 those obtained in the first comparison (non-magnetic versus magnetic beads both run on the Bio-Plex®  
243 200 instrument), and provide further support for our finding that antigens coupled to either type of  
244 beads and run on either instrument generally give very comparable total IgG measurements. As we  
245 observed in the first comparison, the weakest correlation was again for the protein PVX\_003770  
246 ( $r^2=0.18$ ).

247

248 **Figure 3:** IgG antibody levels (RAU) measured against 19 *P. vivax* proteins in samples from malaria-  
249 endemic areas, using non-magnetic beads and run on a Bio-Plex® 200 compared to use of magnetic  
250 beads run on a MAGPIX® instrument. \*\*\*\*  $p < 0.0001$ .

251

252 **External validation of a multiplexed assay using *P. vivax* antigens coupled to non-magnetic**  
253 **beads and analyzed on a Bio-Plex® 200 instrument.**

254 The results thus far indicate that IgG levels measured using either non-magnetic or magnetic beads  
255 and assayed on either a Bio-Plex® 200 or MAGPIX® instrument are highly comparable. A group of 3  
256 staff members, but all at the same Institute (Walter & Eliza Hall Institute, WEHI) using the same

257 instruments, performed these measurements. Therefore an additional comparison was performed:  
258 external validation of the assay at an independent research Institute located overseas (Case Western  
259 Reserve University, CWRU).

260

261 A set of 425 plasma samples were aliquoted at CWRU and shared with WEHI. At the same time, a set  
262 of 12 *P. vivax* proteins (Table 2) were coupled to non-magnetic beads at WEHI and shared with CWRU.  
263 During the same week assays were performed to measure total IgG antibodies against these *P. vivax*  
264 antigens in the 425 plasma samples on Bio-Plex® 200 instruments independently at each Institute (total  
265 of 6 plates run at each Institute). After exclusion of plates or samples following quality control checks  
266 (positive control – log-linear standard curve; bead counts > 15), data from 318 samples was directly  
267 compared between sites. The drop from 425 to 318 samples was largely due to one plate with failed  
268 standard curves that could not be repeated due to sample availability. IgG levels were compared first  
269 using raw data (MFI values). The Pearson  $r^2$  correlation coefficients indicated a strong correlation for all  
270 proteins with  $r^2$ -values  $\geq 0.58$  ( $p < 0.0001$ ), with the exception of PVX\_094255 (RBP2b) ( $r^2 = 0.32$ ,  
271  $p < 0.0001$ ) (Table 3, scatter plots in Figure S1). The same correlation analysis was then performed on  
272 data converted in R using the standard curves (to account for any plate-plate variation). Strong  
273 correlation coefficients were observed for all 12 proteins, including PVX\_094255 ( $r^2$  values  $> 0.51$ ,  
274  $p < 0.0001$ ) (Table 3, scatter plots in Figure S2). For the majority of proteins, the correlation was stronger  
275 after conversion (Table 3). This is expected given the conversion, based on the standard curve  
276 generated with a plasma pool from immune PNG donors, is used to account for any plate-plate  
277 variation.

278

279 These results indicate that data generated using this multiplexed assay are highly reproducible in a  
280 different laboratory setting when the same coupled-beads are used, particularly if both laboratories  
281 have access to the same positive control for standardization. Unfortunately, whilst there is a WHO  
282 reference reagent for *P. falciparum* serology studies [14], there is not yet a similar product available for

283 *P. vivax*. Importantly, we also assessed the stability of the coupled beads by running the standard curve  
284 10 times over a period of 9 months (intensely for 2 months) (Figure S3). For most proteins the coupled  
285 beads were highly stable (11/16 tested over 9-months), with the MFI dropping for three proteins and  
286 increasing for two proteins. This is supported by previous research that has indicated the stability of  
287 protein-coupled beads [13], noting that the stability may vary by antigen [15].  
288

289 **Table 3:** External validation of the non-magnetic bead assay run on the Bio-Plex® 200. Pearson  $r^2$   
290 correlation coefficients are shown for both the raw data (MFI) and the standard curve converted data  
291 (RAU). \*\*\*\*  $p < 0.0001$ .

| Protein ID | Correlation MFI (n=318) | Correlation RAU (n=318) |
|------------|-------------------------|-------------------------|
| PVX_099980 | 0.76 ****               | 0.85 ****               |
| PVX_096995 | 0.69 ****               | 0.76 ****               |
| PVX_094830 | 0.58 ****               | 0.55 ****               |
| PVX_112670 | 0.63 ****               | 0.65 ****               |
| PVX_082650 | 0.73 ****               | 0.70 ****               |
| PVX_094255 | 0.32 ****               | 0.51 ****               |
| PVX_001000 | 0.69 ****               | 0.70 ****               |
| PVX_097625 | 0.73 ****               | 0.73 ****               |
| PVX_082735 | 0.81 ****               | 0.85 ****               |
| PVX_082645 | 0.79 ****               | 0.75 ****               |
| PVX_090330 | 0.71 ****               | 0.66 ****               |
| PVX_000930 | 0.80 ****               | 0.83 ****               |

292

## 293 **Conclusions**

294 The aim of this study was to demonstrate that multiplexing assays performed using magnetic beads or  
295 non-magnetic beads are highly comparable, independent of the beads and platform used to analyze the  
296 assays. We compared here a total of 19 *P. vivax* proteins that were coupled to both magnetic beads  
297 and non-magnetic beads. The protein concentration used for the couplings was individually determined  
298 by optimisation for each protein for the chosen bead type (Table 1). For this, a dilution series from the  
299 positive control plasma pool, prepared from immune PNG donors, was used to generate a log-linear  
300 standard curve for each protein. The non-magnetic beads are 5.5µm in size, whilst the magnetic beads



301 are 6.5µm in size, likely accounting for the need to couple on average 0.3µg of protein to non-magnetic  
302 versus 0.8 µg of protein to magnetic beads (per 1x10<sup>6</sup> beads). One coupling reaction using these  
303 amounts of protein is enough to assay > 3000 samples in singlicate, thus the slightly higher amount of  
304 protein required for magnetic beads is unlikely to be a limitation to using this format. We did not assess  
305 the efficiency of antigen coupling, which could potentially be an important variable impacting the  
306 amount of protein required for coupling.

307

308 We have demonstrated that results are highly comparable whether using proteins coupled to magnetic  
309 beads or non-magnetic beads and analysed using either a Bio-Plex<sup>®</sup> 200 (non-magnetic and magnetic  
310 beads) or MAGPIX<sup>®</sup> (magnetic beads only). Our external validation has also demonstrated that results  
311 generated in different laboratories are highly comparable, if a reference standard curve is included for  
312 standardization. Therefore researchers can, in principle, compare data generated with a different type  
313 of bead or assayed using a different instrument platform, if the amount of protein coupled is optimised  
314 for the correct type of bead. Overall, the choice of assay platform and instrument used is up to the user.  
315 Table 4 lists a number of factors that differ between the two platforms that users should consider. An  
316 important consideration is that up to 100 different proteins can be assayed simultaneously using non-  
317 magnetic beads and a Bio-Plex<sup>®</sup> 200 instrument, whereas the maximum is 50 proteins using a  
318 MAGPIX<sup>®</sup>. If less than 50 proteins will be used, the MAGPIX<sup>®</sup> instrument is cheaper and enables  
319 washing steps to be conducted with magnets, which improves both bead retention [13, 16] and speed  
320 of the assay.

321

322 For future use and development of the assay, we recommended that a reference laboratory provide  
323 both protein-coupled beads and a positive control, along with a Standard Operating Procedure for the  
324 assay. All protein-coupled beads should be tested for stability and researchers provided with an expiry  
325 date for their use, in addition to checking the performance of the standard curve before each use. This  
326 should ensure repeatable and comparable measurements are generated between different research

327 groups. A key focus of *P. vivax* serology efforts should be to develop a standard WHO reference  
328 reagent for *P. vivax* that is available to any research group worldwide.  
329

330 **Table 4:** Comparison of the two platforms commonly used for Luminex bead-based assays.

|                          | <b>Bio-Plex® 200 instrument</b>                                                                                             | <b>MAGPIX® instrument</b>                                                                                      |
|--------------------------|-----------------------------------------------------------------------------------------------------------------------------|----------------------------------------------------------------------------------------------------------------|
| <b>Technology</b>        | Cytometer based analysis                                                                                                    | LED/Image based analysis;<br>Easier to transport and relocate;<br>Lower sheath fluid consumption               |
| <b>Cost</b>              | ~A\$ 80,000                                                                                                                 | ~A\$ 40,000                                                                                                    |
| <b>Time</b>              | Running time of a 96 well plate around<br>210 minutes                                                                       | Running time of a 96 well plate around<br>75 minutes                                                           |
| <b>Coupling process</b>  | Centrifugation steps required<br>Slightly more time consuming                                                               | Magnetic rack used for bead<br>separation; very fast                                                           |
| <b>Analyzing process</b> | Use of vacuum manifold during the<br>washing steps, more time consuming                                                     | Use of automated plate washer, less<br>time consuming                                                          |
| <b>Beads</b>             | Non-magnetic beads:<br>~A\$640/ml/1.25x10 <sup>7</sup> beads<br>~ 20% less than magnetic beads<br>Up to 100 beads available | Magnetic beads: ~A\$800/ml/1.25x10 <sup>7</sup><br>beads<br>Up to 50 beads available<br>Better beads retention |

331

332 Whilst these results were obtained in the context of *P. vivax*-specific IgG responses in individuals from  
333 malaria-endemic areas, the large panel of proteins used and consistent results obtained for all proteins  
334 suggest these results can be applied to guide studies in other fields. Luminex xMAP® technology has  
335 been used to measure antibody responses against other infectious pathogens, such as HIV and  
336 influenza [17, 18], to a variety of vaccine antigens such as tetanus toxoid [19], and more recently to  
337 SARS-CoV-2 [6-8].

338

### 339 **Acknowledgements**

340 We wish to acknowledge the extensive field-teams in Thailand, Solomon Islands and PNG that  
341 originally collected samples in the studies that were used for this project. We thank Connie Li-Wai-Suen  
342 for providing the R code for the standard curve transformation.

343

### 344 **List of Supporting Information Files**

345 **Figure S1:** Comparison of IgG antibody levels against 12 *P. vivax* proteins when run at WEHI  
346 compared to CWRU: raw MFI values.

347 **Figure S2:** Comparison of IgG antibody levels against 12 *P. vivax* proteins when run at WEHI  
348 compared to CWRU: converted RAU values.

349 **Figure S3:** Stability of protein-coupled magnetic beads over 9-months. The original coupled beads  
350 were tested at every week for 2 months after coupling, then again at 9 months post-coupling. The MFI  
351 of the standard curves are presented (S1 = 1/50, then 2-fold serial dilution). New vials of secondary  
352 antibodies were opened on 19/02/19, 26/02/19 and 08/03/19. Protein PVX\_094255 (WGCF construct)  
353 was not tested in this experiment.

354

## 355 **References**

- 356 1. Ubillos I, Jimenez A, Vidal M, Bowyer PW, Gaur D, Dutta S, et al. Optimization of incubation  
357 conditions of Plasmodium falciparum antibody multiplex assays to measure IgG, IgG1-4, IgM and  
358 IgE using standard and customized reference pools for sero-epidemiological and vaccine studies.  
359 Malar J. 2018;17(1):219. Epub 2018/06/03. doi: 10.1186/s12936-018-2369-3. PubMed PMID:  
360 29859096; PubMed Central PMCID: PMC5984756.
- 361 2. Fowkes FJI, Richards JS, Simpson JA, Beeson JG. The Relationship between Anti-merozoite  
362 Antibodies and Incidence of Plasmodium falciparum Malaria: A Systematic Review and Meta-  
363 analysis. PLOS Medicine. 2010;7(1):e1000218. doi: 10.1371/journal.pmed.1000218.
- 364 3. Lin A, Salvador A, Carter JM. Multiplexed Microsphere Suspension Array-Based  
365 Immunoassays. In: Hnasko R, editor. ELISA: Methods and Protocols. New York, NY: Springer New  
366 York; 2015. p. 107-18.
- 367 4. Ubillos I, Aguilar R, Sanz H, Jimenez A, Vidal M, Valmaseda A, et al. Analysis of factors  
368 affecting the variability of a quantitative suspension bead array assay measuring IgG to multiple  
369 Plasmodium antigens. PLoS One. 2018;13(7):e0199278. Epub 2018/07/03. doi:  
370 10.1371/journal.pone.0199278. PubMed PMID: 29966018; PubMed Central PMCID:  
371 PMC6028107 he was not affiliated with Antigen Discovery Inc. at the time of the study. This  
372 does not alter our adherence to PLOS ONE policies on sharing data and materials.
- 373 5. Varela ML, Mbengue B, Basse A, Loucoubar C, Vigan-Womas I, Dieye A, et al. Optimization of  
374 a magnetic bead-based assay (MAGPIX((R))-Luminex) for immune surveillance of exposure to  
375 malaria using multiple Plasmodium antigens and sera from different endemic settings. Malar J.  
376 2018;17(1):324. Epub 2018/09/08. doi: 10.1186/s12936-018-2465-4. PubMed PMID: 30189885;  
377 PubMed Central PMCID: PMC6127931.
- 378 6. Rosado J, Pelleau S, Cockram C, Merklings SH, Nekkab N, Demeret C, et al. Serological  
379 signatures of SARS-CoV-2 infection: Implications for antibody-based diagnostics. medRxiv.  
380 2020:2020.05.07.20093963. doi: 10.1101/2020.05.07.20093963.

- 381 7. Selva KJ, van de Sandt CE, Lemke MM, Lee CY, Shoffner SK, Chua BY, et al. Distinct systems  
382 serology features in children, elderly and COVID patients. medRxiv. 2020:2020.05.11.20098459.  
383 doi: 10.1101/2020.05.11.20098459.
- 384 8. Dobaño C, Vidal M, Santano R, Jiménez A, Chi J, Barrios D, et al. Highly sensitive and specific  
385 multiplex antibody assays to quantify immunoglobulins M, A and G against SARS-CoV-2 antigens.  
386 bioRxiv. 2020:2020.06.11.147363. doi: 10.1101/2020.06.11.147363.
- 387 9. Longley RJ, Franca CT, White MT, Kumpitak C, Sa-Angchai P, Gruszczyc J, et al.  
388 Asymptomatic Plasmodium vivax infections induce robust IgG responses to multiple blood-stage  
389 proteins in a low-transmission region of western Thailand. Malar J. 2017;16(1):178. Epub  
390 2017/04/30. doi: 10.1186/s12936-017-1826-8. PubMed PMID: 28454546; PubMed Central  
391 PMCID: PMC5410030.
- 392 10. Longley RJ, White MT, Takashima E, Brewster J, Morita M, Harbers M, et al. Development  
393 and validation of serological markers for detecting recent Plasmodium vivax infection. Nature  
394 medicine. 2020;26(5):741-9. Epub 2020/05/15. doi: 10.1038/s41591-020-0841-4. PubMed  
395 PMID: 32405064.
- 396 11. Nguitrage W, Karl S, White M, Koepfli C, Felger I, Singhasivanon P, et al. Highly  
397 heterogeneous residual malaria risk in western Thailand. Int J Parasitol. 2019. Epub 2019/04/08.  
398 doi: 10.1016/j.ijpara.2019.01.004. PubMed PMID: 30954453.
- 399 12. Quah YW, Waltmann A, Karl S, White MT, Vahi V, Darcy A, et al. Molecular epidemiology of  
400 residual Plasmodium vivax transmission in a paediatric cohort in Solomon Islands. Malar J.  
401 2019;18(1):106. Epub 2019/03/30. doi: 10.1186/s12936-019-2727-9. PubMed PMID: 30922304;  
402 PubMed Central PMCID: PMC6437916.
- 403 13. Ondigo BN, Park GS, Ayieko C, Nyangahu DD, Wasswa R, John CC. Comparison of non-  
404 magnetic and magnetic beads multiplex assay for assessment of Plasmodium falciparum  
405 antibodies. PeerJ. 2019;7:e6120. Epub 2019/01/11. doi: 10.7717/peerj.6120. PubMed PMID:  
406 30627487; PubMed Central PMCID: PMC6321751.
- 407 14. Bryan D, Silva N, Rigsby P, Dougall T, Corran P, Bowyer PW, et al. The establishment of a  
408 WHO Reference Reagent for anti-malaria (Plasmodium falciparum) human serum. Malar J.  
409 2017;16(1):314. Epub 2017/08/07. doi: 10.1186/s12936-017-1958-x. PubMed PMID: 28779755;  
410 PubMed Central PMCID: PMC5545088.
- 411 15. Wu L, Hall T, Ssewanyana I, Oulton T, Patterson C, Vasileva H, et al. Optimisation and  
412 standardisation of a multiplex immunoassay of diverse Plasmodium falciparum antigens to assess  
413 changes in malaria transmission using sero-epidemiology. Wellcome Open Res. 2019;4:26. Epub  
414 2020/06/13. doi: 10.12688/wellcomeopenres.14950.2. PubMed PMID: 32518839; PubMed  
415 Central PMCID: PMC7255915.
- 416 16. Hansenova Manaskova S, van Belkum A, Endtz HP, Bikker FJ, Veerman EC, van Wamel WJ.  
417 Comparison of non-magnetic and magnetic beads in bead-based assays. J Immunol Methods.  
418 2016;436:29-33. Epub 2016/06/15. doi: 10.1016/j.jim.2016.06.003. PubMed PMID: 27296810.
- 419 17. Liechi T, Kadelka C, Ebner H, Friedrich N, Kouyos RD, Gunthard HF, et al. Development of a  
420 high-throughput bead based assay system to measure HIV-1 specific immune signatures in clinical  
421 samples. J Immunol Methods. 2018;454:48-58. Epub 2017/12/27. doi: 10.1016/j.jim.2017.12.003.  
422 PubMed PMID: 29277486.
- 423 18. Germeraad EAE, Achterberg RPR, Venema SS, Post JJ, de Leeuw OO, Koch GG, et al. The  
424 development of a multiplex serological assay for avian influenza based on Luminex technology.  
425 Methods (San Diego, Calif). 2019. Epub 2019/02/02. doi: 10.1016/j.jymeth.2019.01.012. PubMed  
426 PMID: 30707951.

- 427 19. Whitelegg AM, Birtwistle J, Richter A, Campbell JP, Turner JE, Ahmed TM, et al.  
428 Measurement of antibodies to pneumococcal, meningococcal and haemophilus polysaccharides,  
429 and tetanus and diphtheria toxoids using a 19-plexed assay. J Immunol Methods. 2012;377(1-  
430 2):37-46. Epub 2012/02/02. doi: 10.1016/j.jim.2012.01.007. PubMed PMID: 22293629.  
431



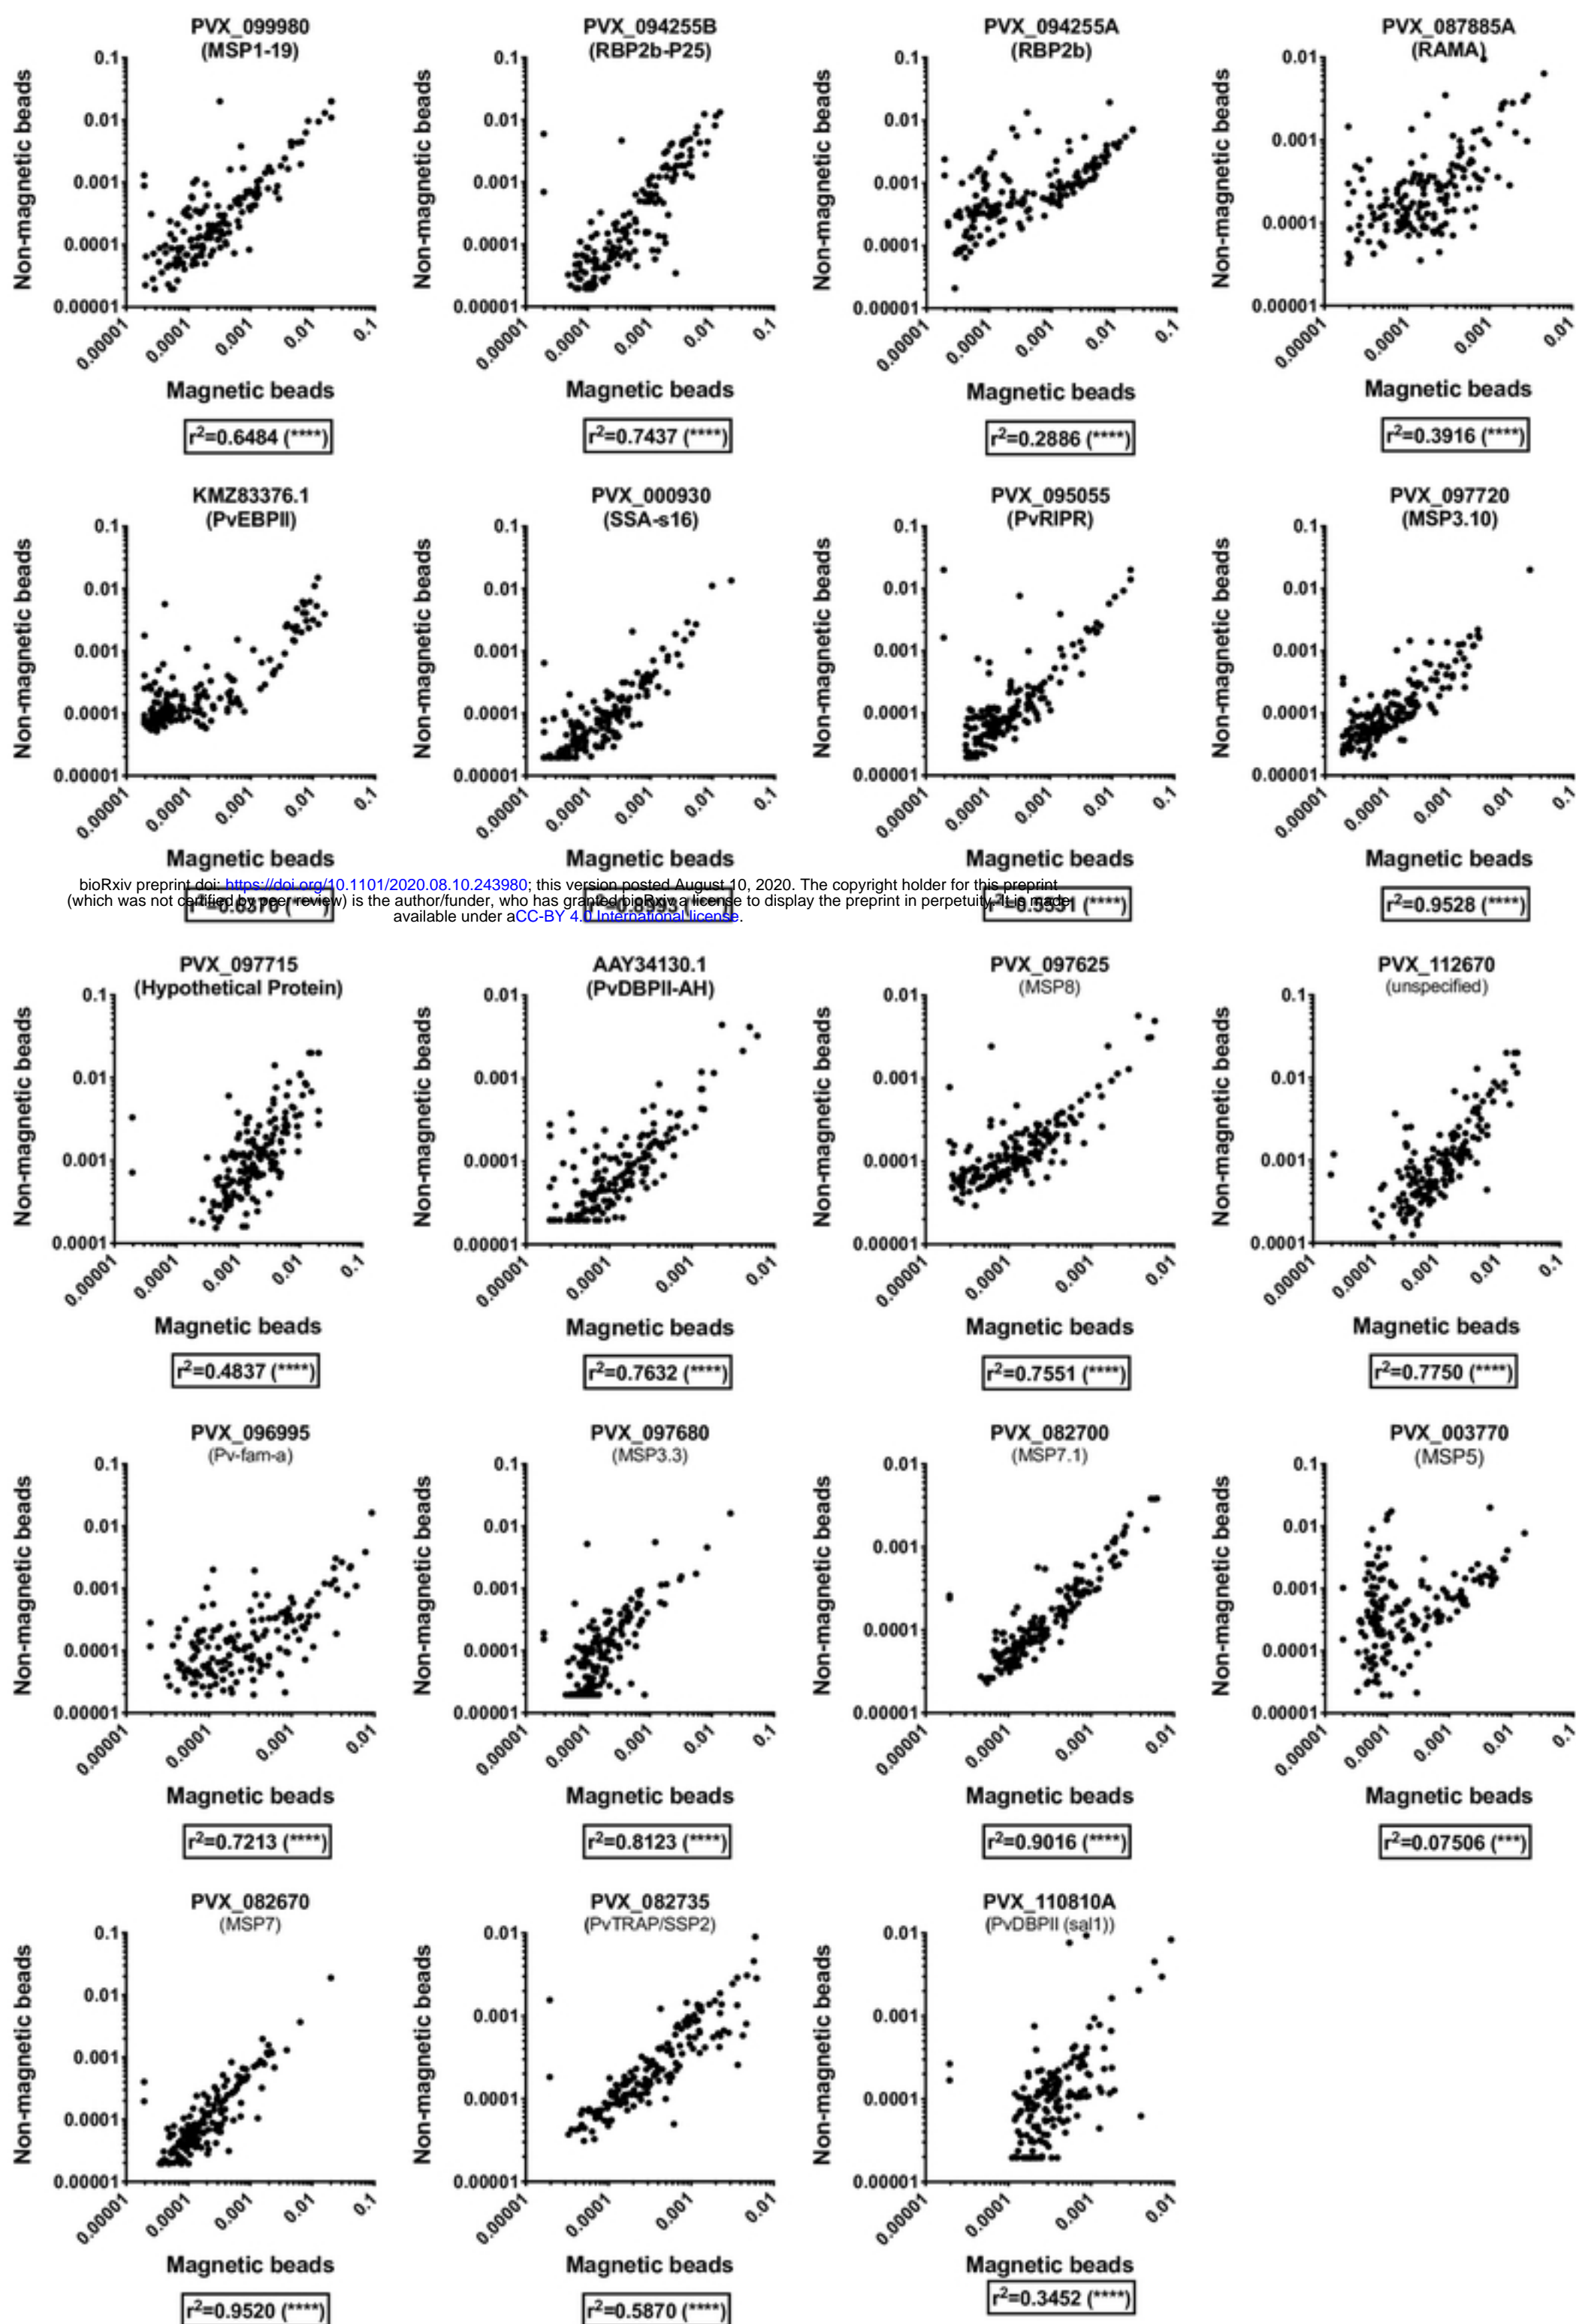

bioRxiv preprint doi: <https://doi.org/10.1101/2020.08.10.243980>; this version posted August 10, 2020. The copyright holder for this preprint (which was not certified by peer review) is the author/funder, who has granted bioRxiv a license to display the preprint in perpetuity. It is made available under aCC-BY 4.0 International license.

Figure 1

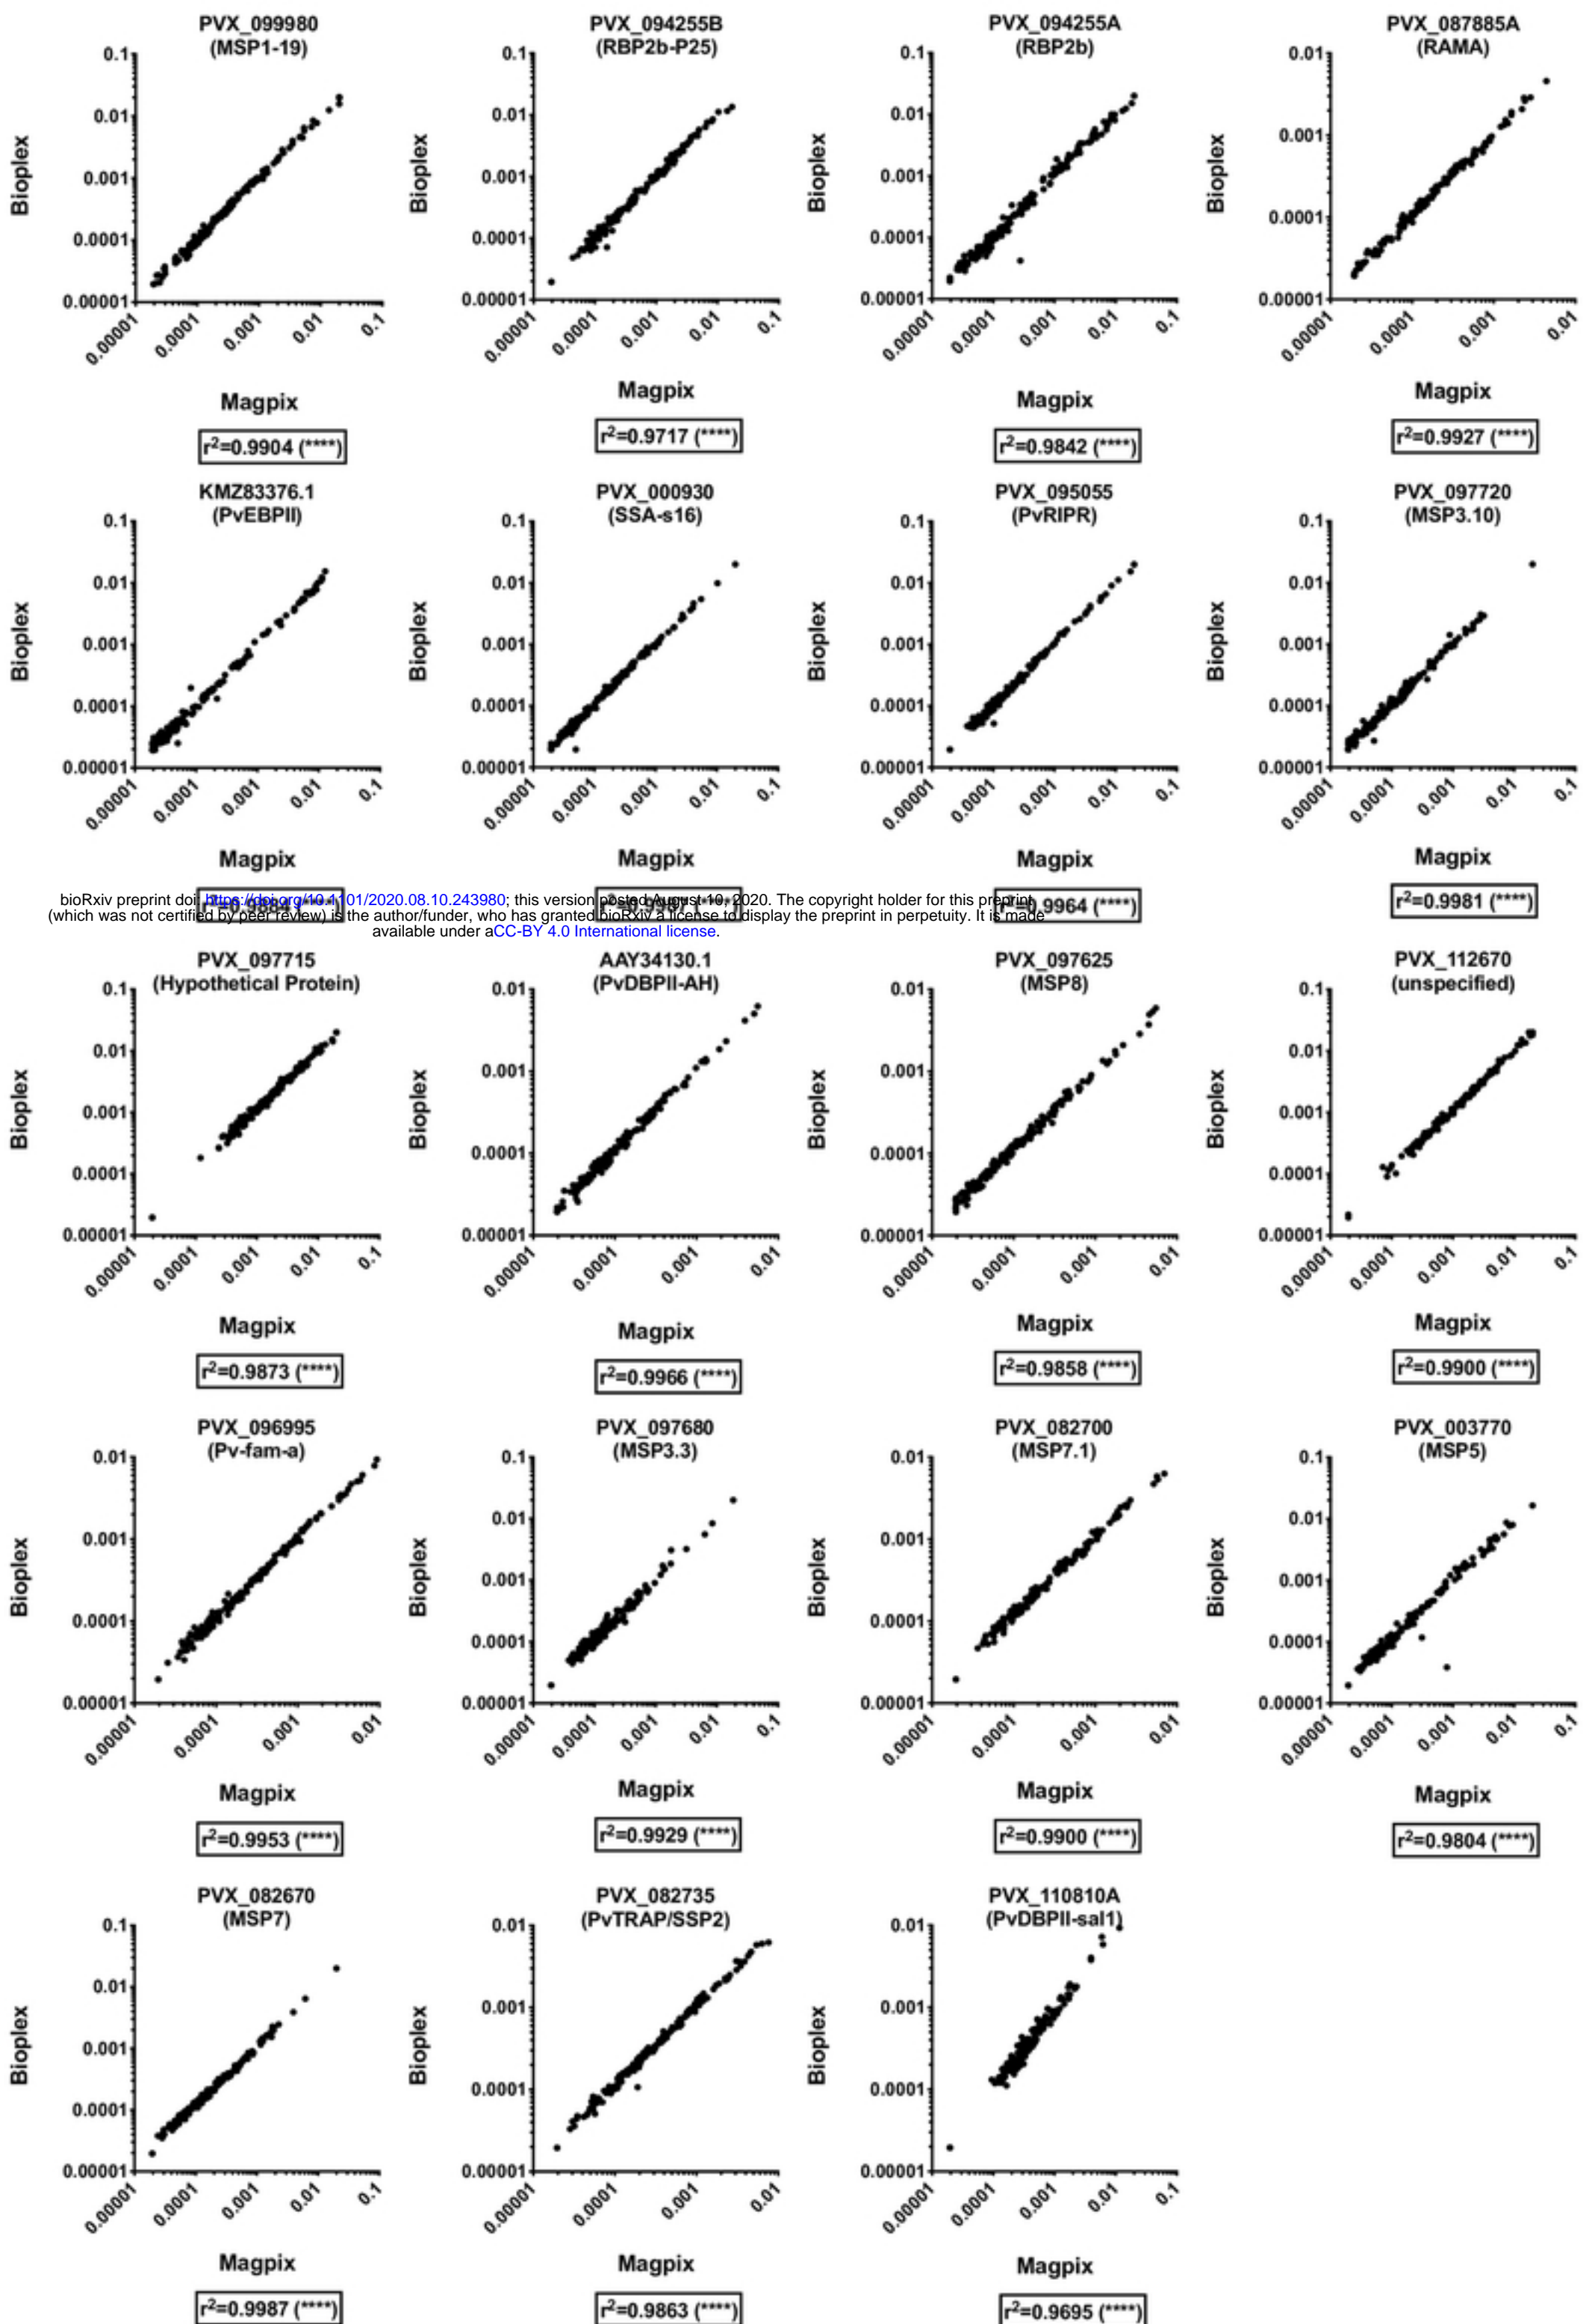

bioRxiv preprint doi: <https://doi.org/10.1101/2020.08.10.243980>; this version posted August 10, 2020. The copyright holder for this preprint (which was not certified by peer review) is the author/funder, who has granted bioRxiv a license to display the preprint in perpetuity. It is made available under aCC-BY 4.0 International license.

Figure2



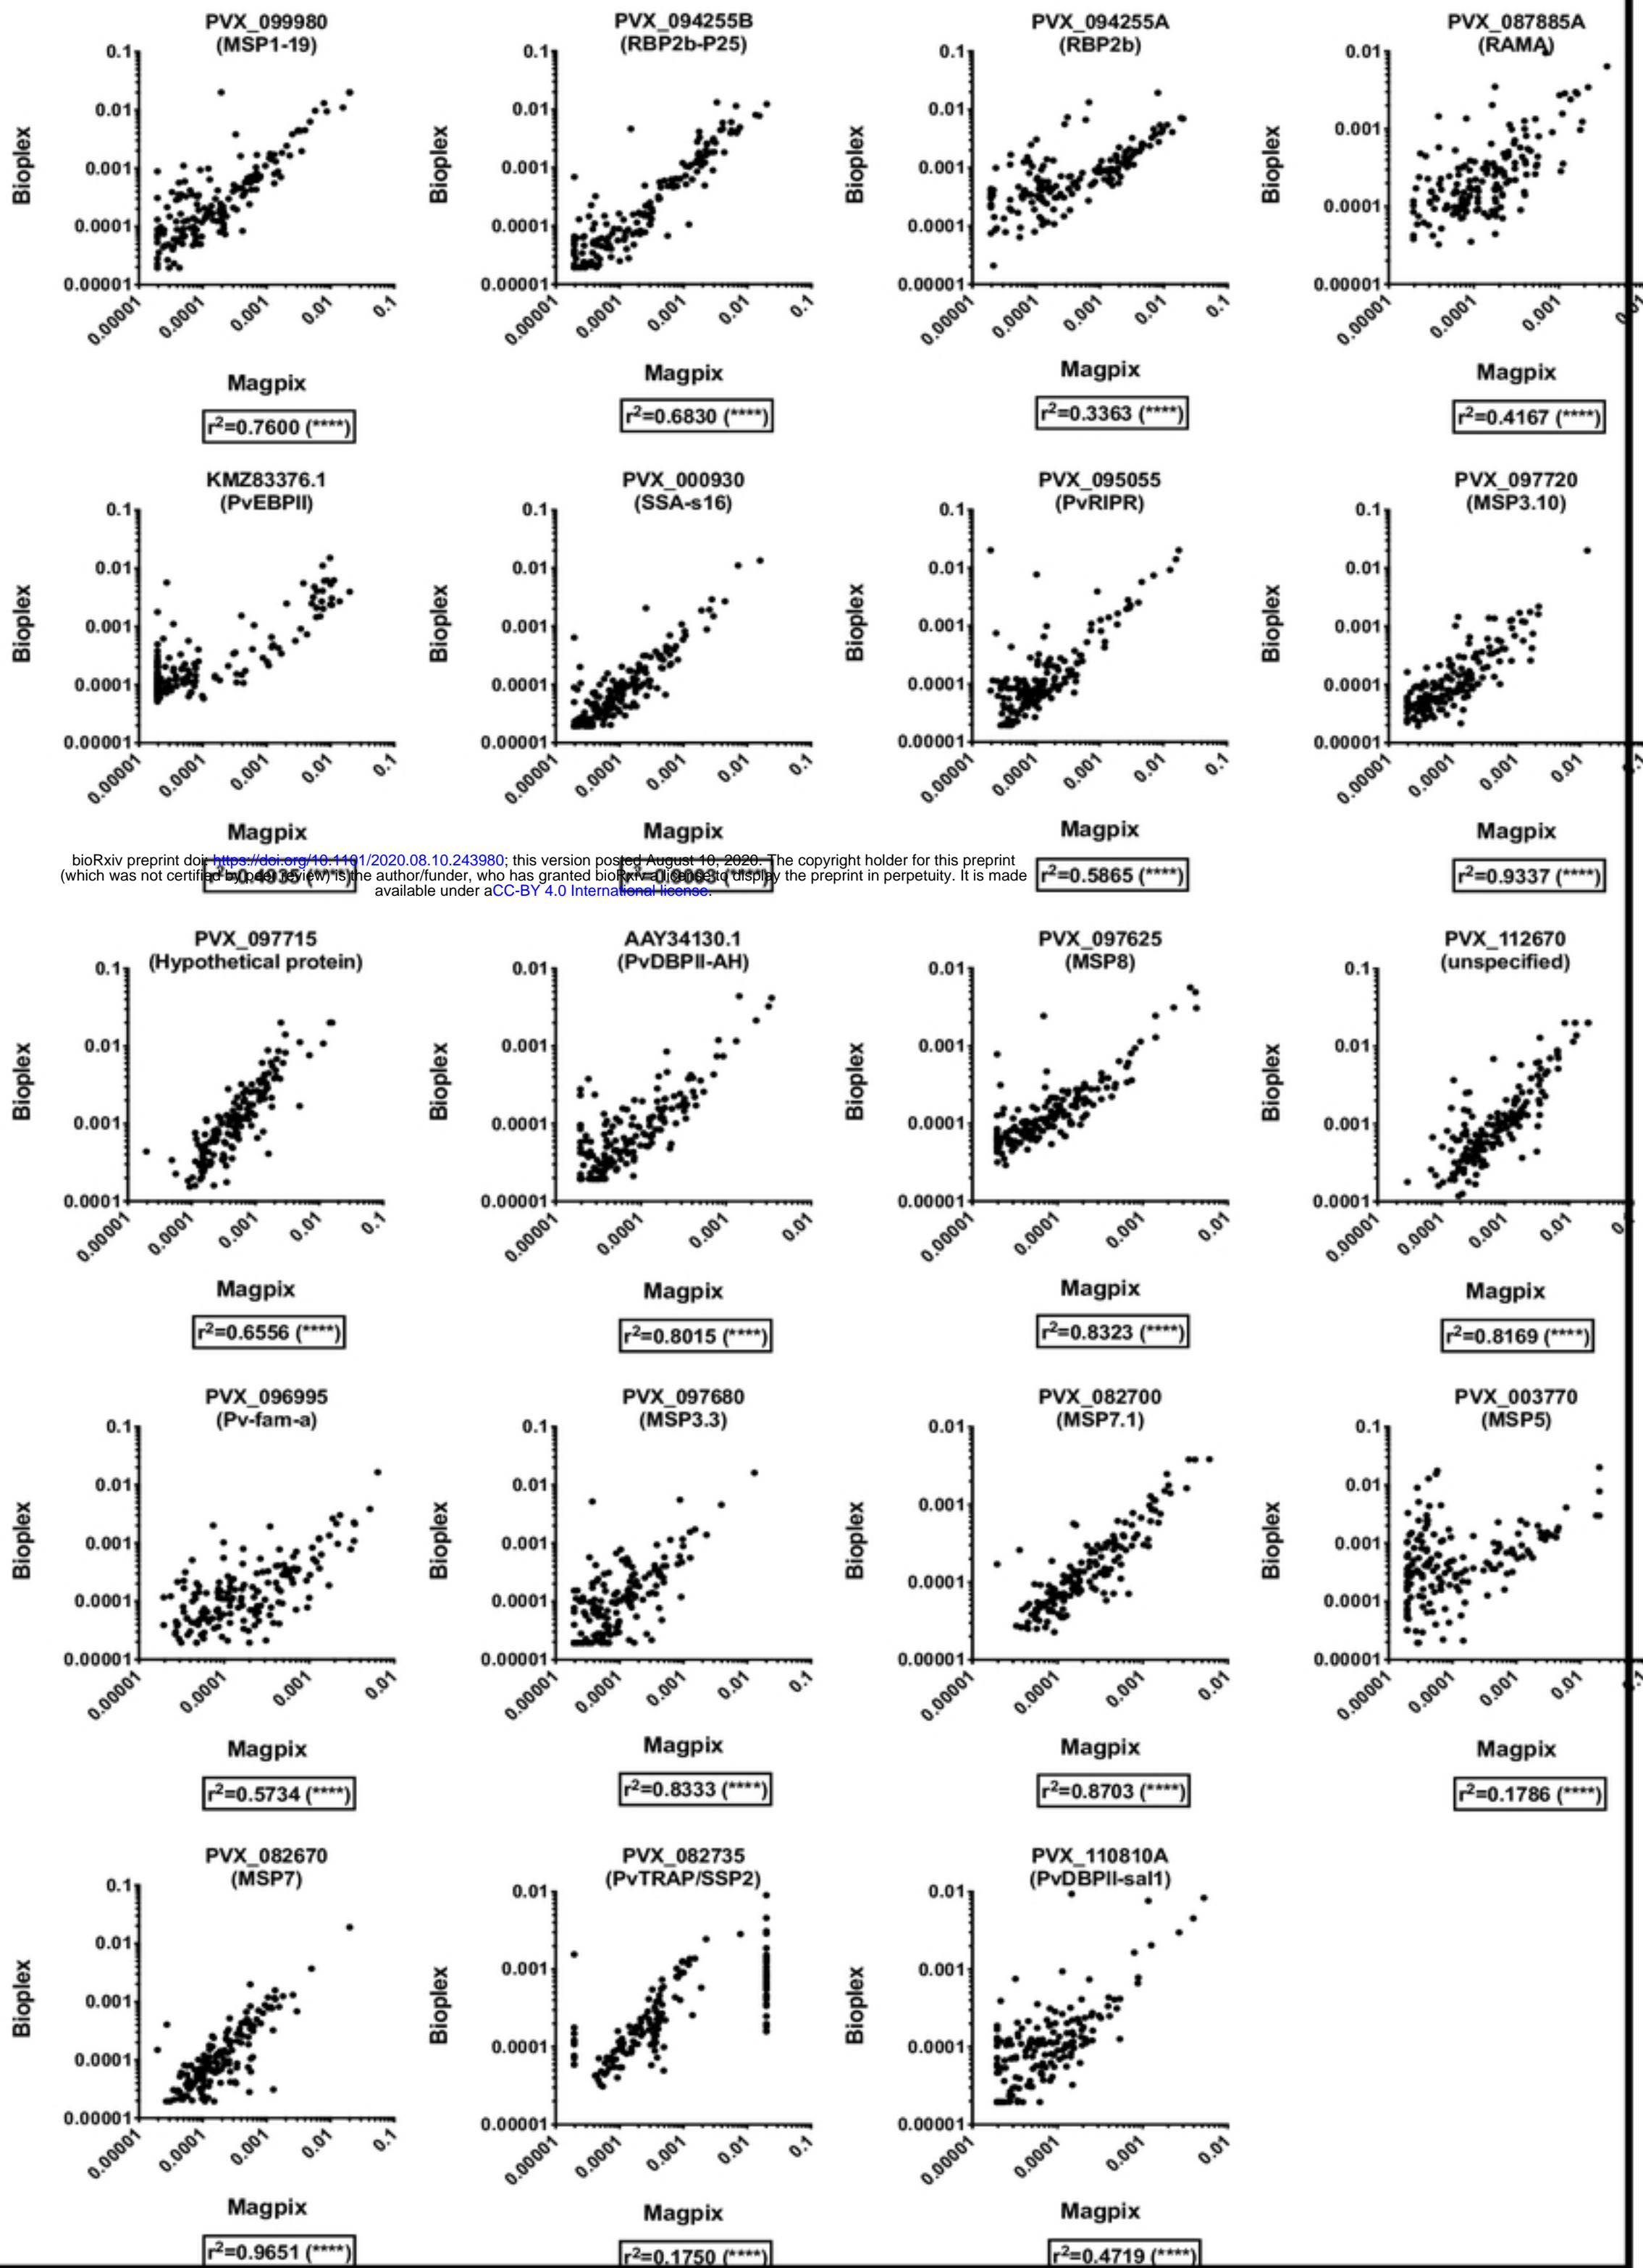

bioRxiv preprint doi: <https://doi.org/10.1101/2020.08.10.243980>; this version posted August 10, 2020. The copyright holder for this preprint (which was not certified by peer review) is the author/funder, who has granted bioRxiv a license to display the preprint in perpetuity. It is made available under aCC-BY 4.0 International license.

Figure3
